# Supplementary material for: Validation of the BATT score for prehospital risk stratification of traumatic haemorrhagic death: usefulness for tranexamic acid treatment criteria
Source: PubMed Central journal article supplement (PMC7789642; doi:10.1186/s13049-020-00827-5), 2021-01-06

Additional file 1

**Supplementary file 1. Abbreviated Injury Scale diagnosis associated with haemorrhage**

- Blood loss > 20%.
- Aorta [OR] Vena Cava [OR] carotid [OR] femoral [OR] Major arteries [OR] veins AND laceration.
- Spleen [OR] liver [OR] Kidney [OR] Myocardium [AND] major laceration.
- Major haemothorax.
- Retroperitoneum haemorrhage.

**Supplementary file 2. Formula for the Brier Score and Scaled Brier Score**

$$\text{Brier Score} = \frac{1}{N} \sum_{i=1}^n (Y - p)^2$$

Which Y is the observed outcome and p the prediction of the model.

$$\text{Brier Score}_{\max} = P \times (1 - P)^2 + (1 - P) \times P^2$$

Which P is the mean of the prediction p.

$$\text{Scaled Brier score} = \frac{1 - \text{Brier}}{\text{Brier}_{\max}}$$

Scaled Brier score ranges from 0% to 100%

### Supplementary file 3. Methods to model tranexamic acid treatment effect and death due to bleeding avoided.

#### First method

- a) We estimated the baseline probabilities of death due to bleeding in the TARN population (P1).

$$P1 = [0.5344157 - 0.5726779 + (0.0604783 * \text{age}) - (0.0013908 * \text{age}^2) + (0.000012 * \text{age}^3) + (0.0234826 * \text{isbp}) - (0.0005366 * \text{isbp}^2) + (0.00000158 * \text{isbp}^3) - (0.6336347 * \text{igcs}) + (0.0738416 * \text{igcs}^2) - (0.0029216 * \text{igcs}^3) - (0.0085677 * \text{ihR}) + (0.0001027 * \text{ihR}^2) - (0.1709854 * \text{irr}) + (0.0059866 * \text{irr}^2) - (0.000054 * \text{irr}^3) + (0.3056116 * \text{penetrating})] * 0.82$$

*P1* (Baseline probabilities of death due to bleeding); *ISBP* (initial systolic blood pressure); *IGCS* (initial Glasgow coma scale); *IHR* (initial heart rate); *IRR* (initial respiratory rate); *Penetrating injury*.

- b) We used previous studies exploring treatment effect by time and baseline risk (TE).

$$TE = OR_{\text{txa/time}} * OR_{\text{txa/baseline risk}}$$

*TE* (treatment effect); *OR* (Odds ratio)

*OR txa/time* is function of delay from Accident to Ambulance Arrival (Prehospital treatment) or Delay from Accident to Hospital Arrival (In-hospital treatment). (REF Lancet Gayet)

|                              |                               |                               |
|------------------------------|-------------------------------|-------------------------------|
| 0.70235307 if delay=0 min    | 0.76495222 if delay ==65 min  | 0.83300851 if delay ==130 min |
| 0.70698462 if delay=5 min    | 0.76998788 if delay ==70 min  | 0.83848272 if delay ==135 min |
| 0.71164609 if delay ==10 min | 0.77505601 if delay ==75 min  | 0.84399218 if delay ==140 min |
| 0.71633767 if delay ==15 min | 0.78015683 if delay ==80 min  | 0.84953709 if delay ==145 min |
| 0.72105956 if delay ==20 min | 0.78529054 if delay ==85 min  | 0.8551177 if delay ==150 min  |
| 0.72581194 if delay ==25 min | 0.79045734 if delay ==90 min  | 0.86073421 if delay ==155 min |
| 0.73059501 if delay ==30 min | 0.79565744 if delay ==95 min  | 0.86638687 if delay ==160 min |
| 0.73540897 if delay ==35 min | 0.80089106 if delay ==100 min | 0.87207589 if delay ==165 min |
| 0.740254 if delay ==40 min   | 0.80615841 if delay ==105 min | 0.87780151 if delay ==170 min |
| 0.7451303 if delay ==45 min  | 0.81145969 if delay ==110 min | 0.88356395 if delay ==175 min |
| 0.75003808 if delay ==50 min | 0.81679513 if delay ==115 min | 0.88936344 if delay ==180 min |
| 0.75497752 if delay ==55 min | 0.82216493 if delay ==120 min |                               |
| 0.75994883 if delay ==60 min | 0.82756932 if delay ==125 min |                               |

*OR txa/baseline risk* is constant=1 (Ref BJA)

- c) We estimated Post-Treatment probabilities of death due to bleeding (P2)

$$P2 = P1 * TE$$

- d) We estimated the number of death due to bleeding avoided by tranexamic acid.

$$\text{Number of death avoided} = \sum P1 - \sum P2$$

- e) Net benefit

Net benefit= Number of death avoided – Number of death due to side effect

We considered tranexamic acid treatment within 3 hours from injury. In this time interval, we did not find any randomized control trial reporting death due to side effect or any increase of non-fatal vascular occlusive event.

$$\text{Net Benefit} = \text{Number of death avoided}$$

### Sensitivity analysis (Second method)

- a) We estimated the baseline probabilities of death due to bleeding in the TARN population ( $P_{1_{obs}}$ ).

We divided death due to bleeding by treatment effect for patient treated by tranexamic acid to estimate baseline probabilities.

$$P_{1_{obs}} = (Death_{obs})_{if\ TXA=0} + \left(\frac{Death_{obs}}{TE}\right)_{if\ TXA=1}$$

Death<sub>obs</sub>=Early death with evidence of haemorrhage

- b) We estimated Post-Treatment probabilities of death due to bleeding ( $P_2$ )

$$P_2 = P_{1_{obs}} * TE$$

- c) We estimated the number of death due to bleeding avoided by tranexamic acid.

$$\text{Number of death avoided} = \sum P_1 - \sum P_2$$

- d) Net benefit

Net benefit= Number of death avoided – Number of death due to side effect

We considered tranexamic acid treatment within 3 hours from injury. In this time interval, we did not find any randomized control trial reporting death due to side effect or any increase of non-fatal vascular occlusive event.

$$\text{Net Benefit} = \text{Number of deaths avoided}$$

Supplementary file 4. Receiving Operator Curve for external validation of the BATT score.

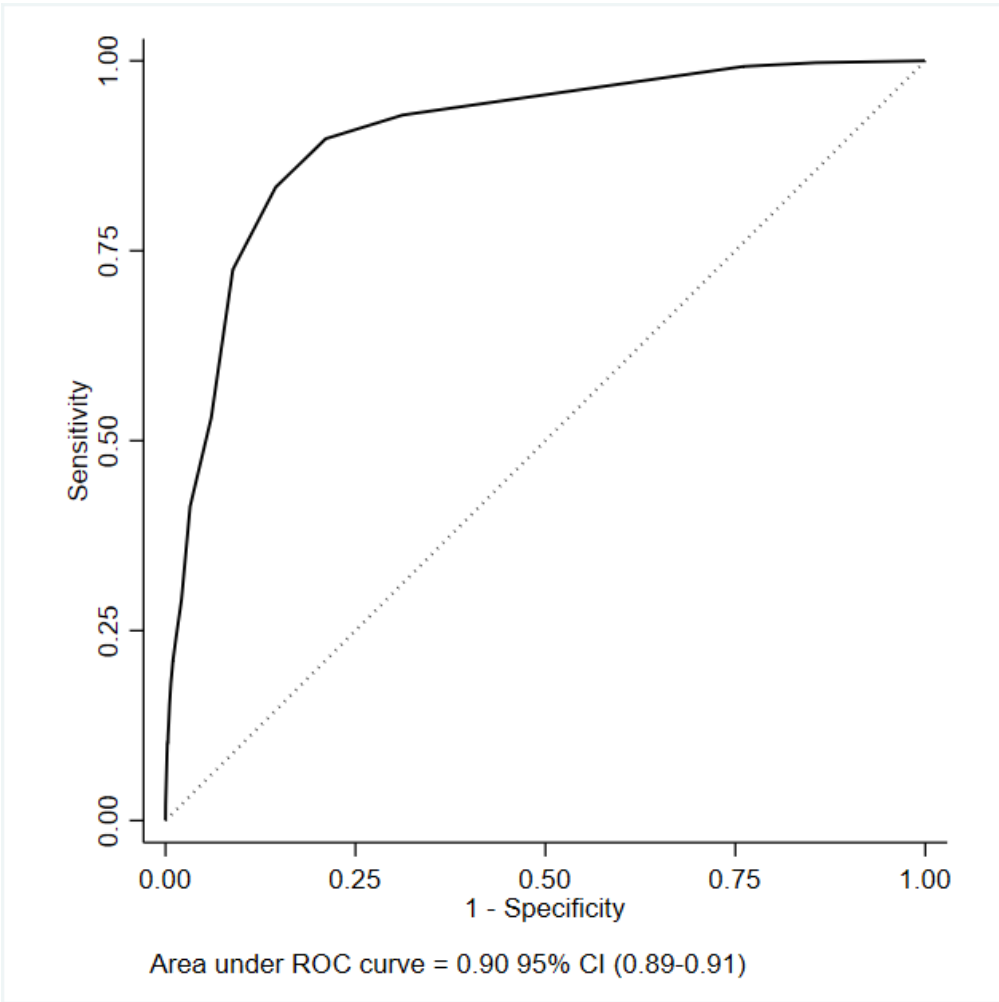

**Supplementary figure 5. Sensitivity and specificity according to BATT score for death due to bleeding.**

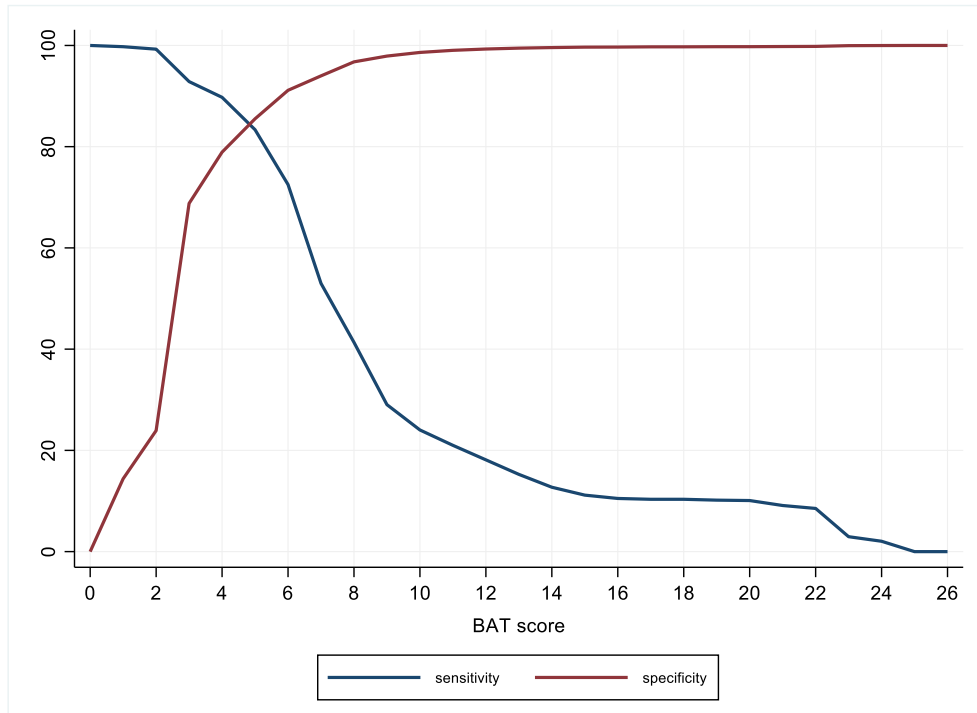

| Threshold | Sensitivity (%) | Specificity (%) | Likelihood ratio + | Likelihood ratio - |
|-----------|-----------------|-----------------|--------------------|--------------------|
| 0         | 100             | 0               | 1                  | -                  |
| ≥ 1       | 100             | 14              | 1.17               | 0.017              |
| ≥ 2       | 99              | 24              | 1.31               | 0.031              |
| ≥ 3       | 93              | 69              | 2.98               | 0.104              |
| ≥ 4       | 90              | 79              | 4.26               | 0.130              |
| ≥ 6       | 73              | 91              | 8.18               | 0.302              |
| ≥ 8       | 41              | 97              | 12.77              | 0.606              |
| ≥ 10      | 24              | 99              | 17.37              | 0.770              |
| ≥ 12      | 18              | 99              | 25.42              | 0.825              |

Supplementary file 6. Calibration curve for external validation of the BATT score.

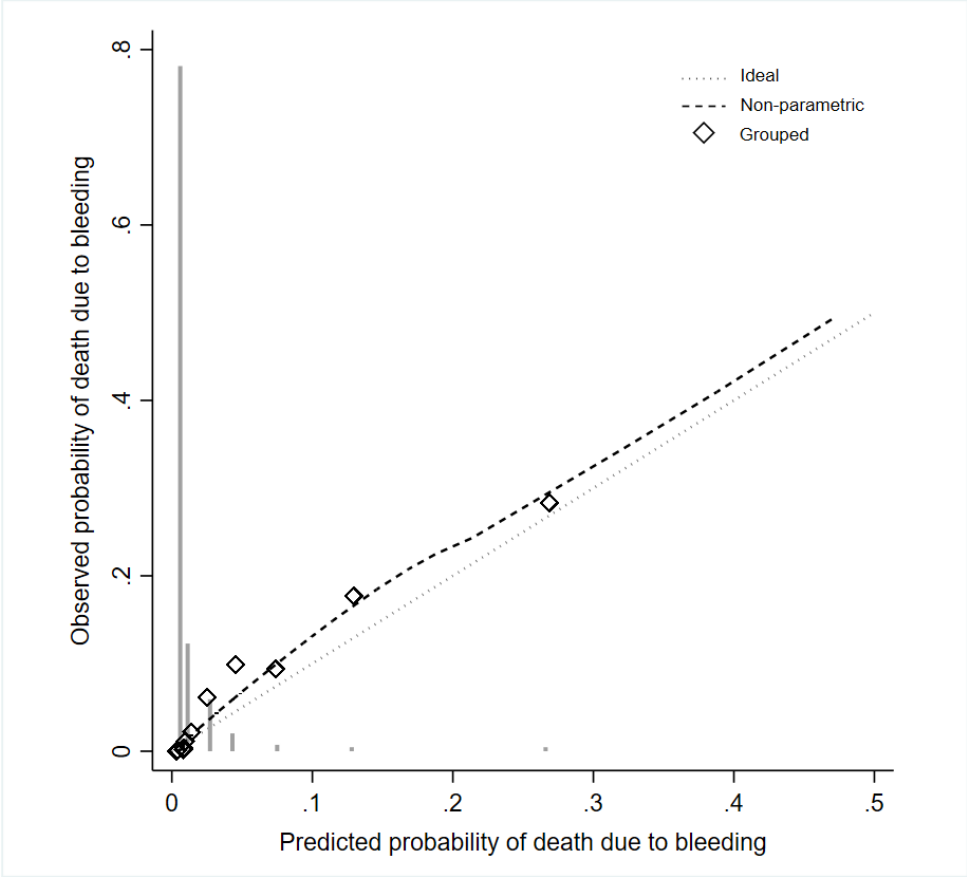

Supplement: 13049_2020_827_MOESM1_ESM.pdf [file 13049_2020_827_MOESM1_ESM.pdf]
